# Supplementary material for: Metagenome-based characterization of the gut bacteriome, mycobiome, and virome in patients with chronic hepatitis B-related liver fibrosis
Source: Front Microbiol. 2024 Oct 25;15:1449090. doi: 10.3389/fmicb.2024.1449090 (PMC11543496; doi:10.3389/fmicb.2024.1449090)
Supplement: Supplementary file 3 [file Table_3.XLSX]

## Sheet: Table S3
Table S3| Comparison of the gut bacteriome functional of CHB-LF patients and healthy controls at the pathway level.
MetaCYC pathway ID	Avg. abundance in patients	Avg. abundance in controls	Fold change	LEFSE-LDA	Enriched in	pvalue	qvalue
PWY-5154: L-arginine biosynthesis III (via N-acetyl-L-citrulline)	0.240395	0.49588	2.06277	3.69538	HC	0.000432812	0.00622167
PWY-6168: flavin biosynthesis III	0.193705	0.428951	2.21445	3.63241	HC	0.000644147	0.00678444
PWY-7456: β-(1,4)-mannan degradation	0.108552	0.263757	2.42978	3.4212	HC	0.000258885	0.00421386
P108-PWY: pyruvate fermentation to propanoate I	0.0588153	0.231718	3.93975	3.36496	HC	2.70668e-05	0.000718311
PWY-5005: biotin biosynthesis II	0.0484467	0.107478	2.21848	3.03132	HC	0.0058659	0.0281836
HISDEG-PWY: L-histidine degradation I	0.0431945	0.198553	4.59672	3.29788	HC	2.45842e-05	0.000706795
PWY-5030: L-histidine degradation III	0.0421521	0.219995	5.21907	3.34241	HC	1.91854e-05	0.000661895
PWY-7384: anaerobic energy metabolism (invertebrates, mitochondrial)	0.027701	0.0691326	2.49567	2.83968	HC	0.00168338	0.0133899
P163-PWY: L-lysine fermentation to acetate and butanoate	0.0125962	0.0479505	3.80673	2.68079	HC	0.00165475	0.0133899
P161-PWY: acetylene degradation (anaerobic)	0.615214	0.242867	2.53313	3.78903	CHB	1.78767e-10	6.16746e-08
P164-PWY: purine nucleobases degradation I (anaerobic)	0.365787	0.0953476	3.83636	3.56323	CHB	1.84647e-06	0.000127406
PWY-6471: peptidoglycan biosynthesis IV (Enterococcus faecium)	0.348701	0.156609	2.22657	3.54245	CHB	0.000507662	0.00626385
P461-PWY: hexitol fermentation to lactate, formate, ethanol and acetate	0.269597	0.109561	2.4607	3.43072	CHB	0.00251717	0.0160819
P185-PWY: formaldehyde assimilation III (dihydroxyacetone cycle)	0.206068	0.0536443	3.84137	3.31401	CHB	0.000129019	0.00247286
PWY-6606: guanosine nucleotides degradation II	0.202871	0.0792373	2.5603	3.30722	CHB	0.0038893	0.0216421
PWY-7115: C4 photosynthetic carbon assimilation cycle, NAD-ME type	0.201646	0.0932894	2.16151	3.30459	CHB	3.74278e-05	0.000922329
PWY0-1479: tRNA processing	0.184703	0.0917104	2.01398	3.26647	CHB	0.00283157	0.0172443
LACTOSECAT-PWY: lactose and galactose degradation I	0.172954	0.0547459	3.15922	3.23793	CHB	4.71613e-05	0.00108471
PWY0-862: (5Z)-dodecenoate biosynthesis I	0.172036	0.0678281	2.53635	3.23562	CHB	0.000526526	0.00626385
PWY-7664: oleate biosynthesis IV (anaerobic)	0.171845	0.0714052	2.40662	3.23514	CHB	0.000776735	0.00765638
FUCCAT-PWY: fucose degradation	0.166004	0.0386056	4.29999	3.22012	CHB	6.46933e-05	0.00139495
PWY-6282: palmitoleate biosynthesis I (from (5Z)-dodec-5-enoate)	0.153239	0.0636682	2.40683	3.18537	CHB	0.00100317	0.00961375
PWY-5723: Rubisco shunt	0.152094	0.0339711	4.47715	3.18211	CHB	0.0122942	0.0466098
DENOVOPURINE2-PWY: superpathway of purine nucleotides de novo biosynthesis II	0.14892	0.030941	4.81301	3.17295	CHB	0.0001976	0.00340861
PWY-5989: stearate biosynthesis II (bacteria and plants)	0.141133	0.0652142	2.16415	3.14963	CHB	0.00197807	0.0136487
PRPP-PWY: superpathway of histidine, purine, and pyrimidine biosynthesis	0.109213	0.028154	3.87912	3.03827	CHB	0.00177572	0.0133899
PPGPPMET-PWY: ppGpp metabolism	0.100569	0.0337531	2.97956	3.00247	CHB	0.000477171	0.00626385
PWY-5265: peptidoglycan biosynthesis II (staphylococci)	0.0969503	0.00684255	>10	2.98655	CHB	0.00760169	0.0336228
GOLPDLCAT-PWY: superpathway of glycerol degradation to 1,3-propanediol	0.0949072	0.0402535	2.35774	2.9773	CHB	0.000484436	0.00626385
PWY-5173	0.0908577	0.0158847	5.71984	2.95836	CHB	0.00186294	0.0133899
KETOGLUCONMET-PWY: ketogluconate metabolism	0.0902622	0.0127108	7.10121	2.95551	CHB	0.00915481	0.0371577
PWY-7013: (S)-propane-1,2-diol degradation	0.0860102	0.0303336	2.83547	2.93455	CHB	0.0086135	0.0354388
ARGORNPROST-PWY	0.0841445	0.0347545	2.42111	2.92503	CHB	0.000545055	0.00626814
PWY-7315: dTDP-N-acetylthomosamine biosynthesis	0.0787224	0.0334121	2.35611	2.8961	CHB	0.00478813	0.0250289
PWY-7269: mitochondrial NADPH production (yeast)	0.0784925	0.0101932	7.70046	2.89483	CHB	0.00183065	0.0133899
PWY-7204: pyridoxal 5'-phosphate salvage II (plants)	0.0645369	0.00823535	7.83656	2.80981	CHB	0.012794	0.0474618
HEME-BIOSYNTHESIS-II: heme b biosynthesis I (aerobic)	0.0601753	0.0115401	5.21446	2.77942	CHB	0.0116336	0.0445953
PWY-7187: pyrimidine deoxyribonucleotides de novo biosynthesis II	0.0520889	0.00955811	5.4497	2.71674	CHB	0.00410742	0.022253
TEICHOICACID-PWY: poly(glycerol phosphate) wall teichoic acid biosynthesis	0.0498977	0.0189795	2.62903	2.69808	CHB	0.00284906	0.0172443
METHGLYUT-PWY: superpathway of methylglyoxal degradation	0.047555	0.00166251	>10	2.6772	CHB	0.00314002	0.0184526
PWY-5920: superpathway of heme b biosynthesis from glycine	0.0251142	0.00159214	>10	2.39992	CHB	0.00742908	0.0332861
PWY0-41: allantoin degradation IV (anaerobic)	0.0131608	0	>10	2.11928	CHB	0.00142591	0.0129458
P125-PWY: superpathway of (R,R)-butanediol biosynthesis	0.010509	0	>10	2.02156	CHB	0.000114151	0.00231659
3-HYDROXYPHENYLACETATE-DEGRADATION-PWY: 4-hydroxyphenylacetate degradation	0.00924679	0	>10	1.96599	CHB	0.00315566	0.0184526
PWY-5692: allantoin degradation to glyoxylate II	0.00659466	0	>10	1.81919	CHB	0.00684805	0.0310865
URDEGR-PWY: superpathway of allantoin degradation in plants	0.00659466	0	>10	1.81919	CHB	0.00684805	0.0310865
